# Supplementary material for: Ti[BP2O7(OH)3]: The first titanium borophosphate containing novel anionic partial structure
Source: Royal Society of Chemistry journal article supplement (doi:10.1039/c1ce06233f), 2011-01-01
Supplement: c1ce06233f.pdf [file c1ce06233f.pdf]

## Supporting Information

### Captions

- Table S1.** Bond lengths [ $\text{\AA}$ ] and angles [ $^\circ$ ] for compound **1**  
**Figure S1.** SEM images of bipyramid-shaped single crystals for **1**  
**Figure S2.** Energy dispersive spectroscopy for **1**  
**Figure S3.** Simulated and experimental powder X-ray diffraction patterns of **1**  
**Figure S4.** TG curve of compound **1**  
**Figure S5.** IR spectrum of compound **1**

**Table S1.** Bond lengths [Å] and angles [°] for compound **1**

| Bond lengths [Å]    |            |                     |            |
|---------------------|------------|---------------------|------------|
| B(1)-O(3)#1         | 1.460(8)   | P(1)-O(3)           | 1.530(8)   |
| B(1)-O(3)#2         | 1.460(8)   | Ti(1)-O(2)#5        | 1.914(6)   |
| B(1)-O(3)           | 1.460(8)   | Ti(1)-O(2)          | 1.914(6)   |
| B(1)-O(3)#3         | 1.460(8)   | Ti(1)-O(1)#6        | 1.935(4)   |
| P(1)-O(2)           | 1.502(6)   | Ti(1)-O(1)#7        | 1.935(4)   |
| P(1)-O(1)           | 1.526(4)   | Ti(1)-O(1)#8        | 1.935(4)   |
| P(1)-O(1)#4         | 1.526(4)   | Ti(1)-O(1)#9        | 1.935(4)   |
| Bond angles [°]     |            |                     |            |
| O(3)#1-B(1)-O(3)#2  | 112.6(3)   | O(2)#5-Ti(1)-O(1)#7 | 90.19(12)  |
| O(3)#1-B(1)-O(3)    | 112.6(3)   | O(2)-Ti(1)-O(1)#7   | 89.81(12)  |
| O(3)#2-B(1)-O(3)    | 103.4(6)   | O(1)#6-Ti(1)-O(1)#7 | 179.6(2)   |
| O(3)#1-B(1)-O(3)#3  | 103.4(6)   | O(2)#5-Ti(1)-O(1)#8 | 89.81(12)  |
| O(3)#2-B(1)-O(3)#3  | 112.6(3)   | O(2)-Ti(1)-O(1)#8   | 90.19(12)  |
| O(3)-B(1)-O(3)#3    | 112.6(3)   | O(1)#6-Ti(1)-O(1)#8 | 90.001(1)  |
| O(2)-P(1)-O(1)      | 111.98(19) | O(1)#7-Ti(1)-O(1)#8 | 90.001(1)  |
| O(2)-P(1)-O(1)#4    | 111.98(19) | O(2)#5-Ti(1)-O(1)#9 | 89.81(12)  |
| O(1)-P(1)-O(1)#4    | 106.6(3)   | O(2)-Ti(1)-O(1)#9   | 90.19(12)  |
| O(2)-P(1)-O(3)      | 104.2(3)   | O(1)#6-Ti(1)-O(1)#9 | 90.001(1)  |
| O(1)-P(1)-O(3)      | 111.1(2)   | O(1)#7-Ti(1)-O(1)#9 | 90.001(1)  |
| O(1)#4-P(1)-O(3)    | 111.1(2)   | O(1)#8-Ti(1)-O(1)#9 | 179.6(2)   |
| O(2)#5-Ti(1)-O(2)   | 180.000(1) | P(1)-O(1)-Ti(1)#6   | 143.4(2)   |
| O(2)#5-Ti(1)-O(1)#6 | 90.19(12)  | P(1)-O(2)-Ti(1)     | 161.05(13) |
| O(2)-Ti(1)-O(1)#6   | 89.81(12)  | B(1)-O(3)-P(1)      | 136.9(6)   |

Symmetry transformations used to generate equivalent atoms:

#1: -y+5/4, x-3/4, -z-1/4; #2: -x+2, -y+1/2, z; #3: y+3/4, -x+5/4, -z-1/4; #4: -x+1, -y+1/2, z;  
 #5: y+1/4, -x+3/4, -z+1/4; #6: -x+1, -y, -z; #7: x, y+1/2, -z; #8: -y+1/4, x-1/4, z+1/4;  
 #9: y+3/4, -x+3/4, z+1/4.

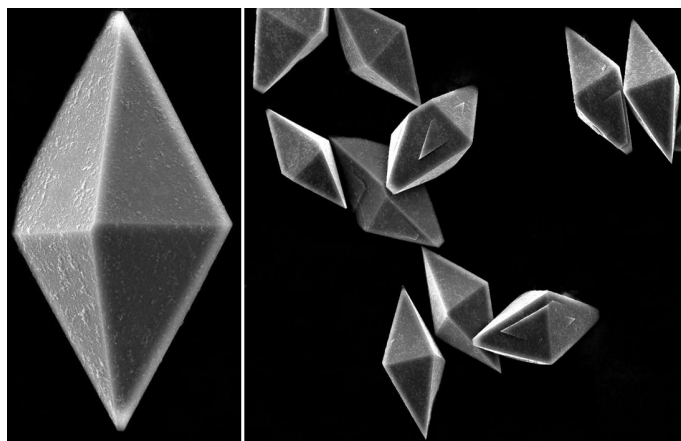

**Figure S1.** SEM images of bipyramid-shaped single crystals for **1**.

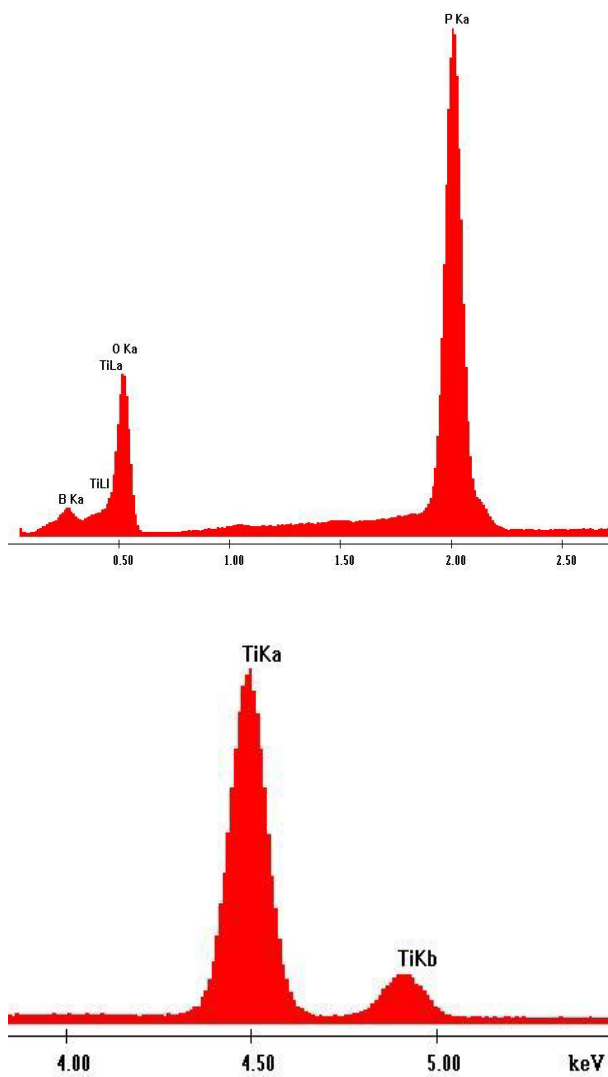

**Figure S2.** Energy dispersive spectroscopy for **1**

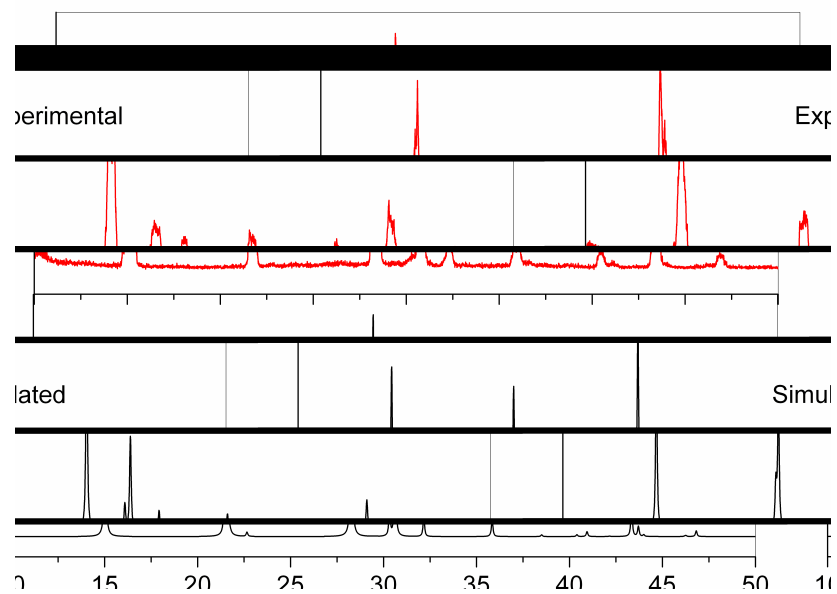

**Figure S3.** Simulated and experimental powder X-ray diffraction patterns of **1**

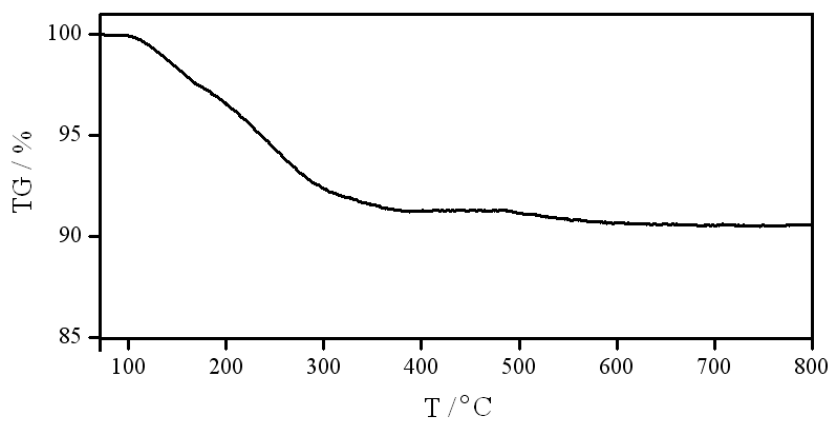

**Figure S4.** TG curve of compound 1

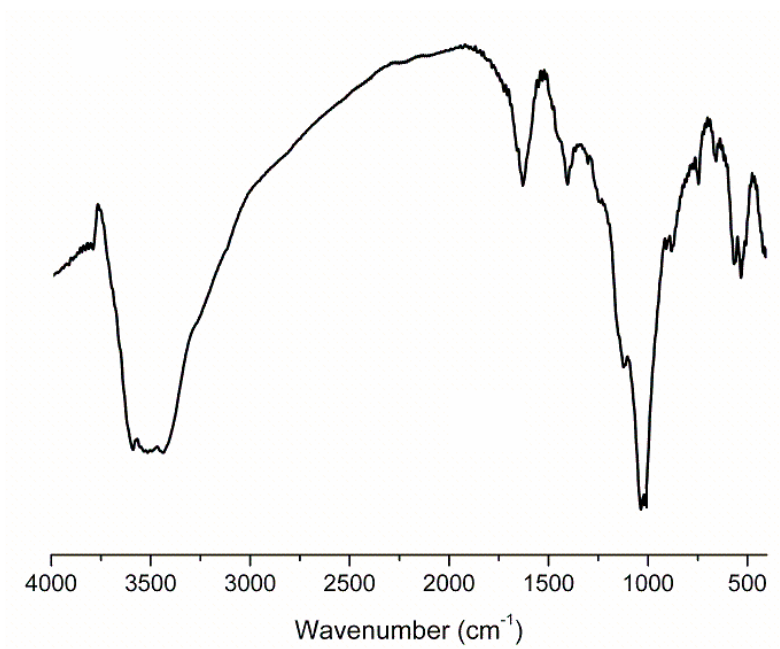

**Figure S5.** IR spectrum of compound **1**
